# Supplementary material
Source: Springer Nature journal article supplement (https://www.springermedizin.de/resource/supplementary/12889_2009_2169_MOESM11_ESM.pdf/9484826)
Supplement: MOESM11 [file 9484826]

**A.**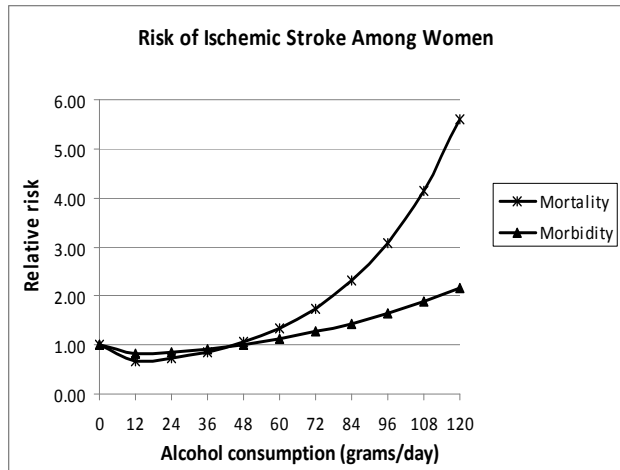

Mortality & Morbidity: J-shaped dose-response,  
 $f(\beta_1 x^{-5} + \beta_2 x)$

**B.**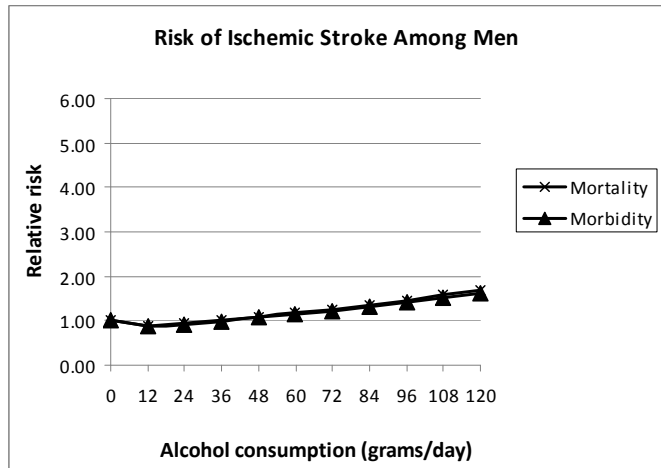

Mortality & Morbidity: J-shaped dose-response,  
 $f(\beta_1 x^{-5} + \beta_2 x^{-5} \log(x))$
